## **High occurrence of transportation and logistics occupations among vascular dementia patients: an observational study**

A.C. van Loenhoud,<sup>1\*</sup> C. de Boer,<sup>1</sup> K. Wols, Y.A. Pijnenburg,<sup>1</sup> A.W. Lemstra,<sup>1</sup> F.H. Bouwman,<sup>1</sup> N.D. Prins,<sup>1</sup> P. Scheltens,<sup>1</sup> R. Ossenkoppele,<sup>1,3</sup> W.M. van der Flier<sup>1,2</sup>

<sup>1</sup>Alzheimer Center Amsterdam, Department of Neurology, Amsterdam Neuroscience, Vrije Universiteit Amsterdam, Amsterdam UMC, 1081 HV, Amsterdam, The Netherlands.

<sup>2</sup>Department of Epidemiology and Biostatistics, Vrije Universiteit Amsterdam, Amsterdam UMC, 1081 HV, Amsterdam, The Netherlands.

<sup>3</sup>Clinical Memory Research Unit, Lund University, 221 00, Lund, Sweden.

\*corresponding author; address: room PK -1 Z 039, Vrije Universiteit Amsterdam, Amsterdam UMC, De Boelelaan 1118, 1081 HV, Amsterdam, The Netherlands; email: [a.vanloenhoud@vumc.nl](mailto:a.vanloenhoud@vumc.nl); telephone: +31 20 4448527; fax: +31 20 4448529.

1 **Abstract**

2 Background: Growing evidence suggests a role of occupation in the emergence and  
3 manifestation of dementia. Occupations are often defined by complexity level, although  
4 working environments and activities differ in several other important ways. We aimed to  
5 capture the multi-faceted nature of occupation through its measurement as a categorical  
6 (instead of quantitative) variable and explored its relationship with different types of  
7 dementia.

8 Methods: We collected occupational history data of 2,121 dementia patients with various  
9 suspected etiologies from the Amsterdam Dementia Cohort (age: 67±8, 57% male, MMSE:  
10 21±5). Our final sample included individuals with Alzheimer's disease (AD) dementia  
11 (n=1,467), frontotemporal dementia (n=281), vascular dementia (n=98), Lewy Body disease  
12 (n=174) and progressive supranuclear palsy/corticobasal degeneration (n=101). Within the  
13 AD group, we used neuropsychological data to further characterize patients by clinical  
14 phenotypes. All participants were categorized into one of 11 occupational classes, across  
15 which we evaluated the distribution of dementia (sub)types with Chi<sup>2</sup> analyses. We gained  
16 further insight into occupation-dementia relationships through post-hoc logistic regressions  
17 that included various demographic and health characteristics as explanatory variables.

18 Results: There were significant differences in the distribution of dementia types across  
19 occupation groups (Chi<sup>2</sup>=85.87, p<.001). Vascular dementia was relatively common in the  
20 Transportation/Logistics sector, and higher vascular risk factors partly explained this  
21 relationship. Alzheimer's disease occurred less in Transportation/Logistics and more in  
22 Health Care/Welfare occupations, which related to a higher/lower percentage of males. We  
23 found no relationships between occupational classes and clinical phenotypes of AD  
24 (Chi<sup>2</sup>=53.65, n.s.).

25 Conclusions: Relationships between occupation and dementia exist beyond complexity level,  
26 which offers new opportunities for disease prevention and improvement of occupational  
27 health policy.

28

29 Keywords: occupation, vascular dementia, Alzheimer's disease, vascular risk factors, sex

30

### 31 **Background**

32 Dementia currently affects 46.8 million people worldwide [1], and this number is expected to  
33 increase as the aging population grows. Causes of dementia include Alzheimer's disease  
34 (AD), frontotemporal dementia (FTD), vascular dementia (VaD) and movement disorders  
35 such as Lewy Body disease (DLB), progressive supranuclear palsy (PSP) and corticobasal  
36 degeneration (CBD). Apart from age and genetic influences, lifestyle factors play a role in the  
37 emergence and manifestation of dementia. For example, a comprehensive body of research  
38 points to the influence of education and occupation on dementia incidence [2-5]. Occupation  
39 could be an especially strong contributing factor, as most individuals spend a major part of  
40 their life at work.

41

42 Studies on the relationship between occupation and dementia have generally focused on the  
43 role of occupational complexity (e.g. rated as "white versus blue collar" [6]). Results indicate  
44 that older individuals who engaged in greater levels of occupational complexity have a better  
45 current cognitive status [6-13], a lower risk to develop dementia [5,14-17] or a different rate  
46 of clinical progression after the onset of dementia [4,11,18]. However, these studies mostly  
47 investigated one particular form of dementia, or "dementia" in general without specifying its  
48 type. Moreover, the common quantification of occupation by complexity level represents an  
49 oversimplification of the multi-faceted quality of this lifestyle factor. Working environments  
50 and activities differ in several important ways beyond complexity level, such as the level of  
51 physical activity, stress, social demands and exposure to hazardous substances [19,20].  
52 Although a broader evaluation of occupation could thus provide important new insights in the  
53 context of dementia, this approach is relatively rare.

54

55 To overcome this scarcity in the literature, we took a different approach by i) measuring  
56 occupation in a categorical rather than a quantitative manner, without making prior

57 assumptions about complexity or other potential protective or harmful factors, and ii) studying  
58 the relationships between occupation and various forms of dementia (i.e. different suspected  
59 etiologies and clinical phenotypes). Our sample included >2000 memory clinic patients with  
60 dementia due to AD, FTD, VaD or movement disorders. Occupation was categorized into  
61 several nominal groups (e.g. Pedagogical, Agricultural, Transportation/Logistics), across  
62 which we compared the distribution of these dementia types [21]. Within the AD subsample,  
63 we had sufficient data to additionally investigate relationships between occupation and  
64 specific cognitive profiles. As this study was exploratory in nature, we did not formulate a  
65 priori hypotheses. For relationships that emerged, we gained further insight through post-hoc  
66 analyses with additional demographic and health characteristics (i.e. age, sex, education and  
67 vascular risk factors [VRFs]).

68

## 69 **Methods**

### 70 Participants

71 Participants were selected from the Amsterdam Dementia Cohort (ADC [22,23]). The sample  
72 consists of individuals who visited the Alzheimer Center of the Amsterdam University Medical  
73 Center between 2000 and 2017. They underwent a standardized screening process that  
74 included the (patient and informant based) collection of demographic information, medical  
75 history, neurological examination, neuropsychological assessment, standard laboratory tests,  
76 brain magnetic resonance imaging (MRI) and lumbar puncture in a subsample. Diagnosis  
77 was established in a multidisciplinary meeting, based on common clinical and research  
78 criteria [22]. Dementia diagnoses in the present study included AD, FTD, VaD, DLB and  
79 PSP/CBD.

80

### 81 Assignment of occupational codes

82 Information on occupational history was collected by a physician during a semi-structured  
83 interview with the participants and their informants. We subsequently coded this information  
84 according to the Dutch ROA-CBS 2014 occupational categorization system (BRC 2014), a

85 derivative of the International Standard Classification of Occupations 2008 (ISCO 2008) [21].  
86 The BRC 2014 consists of the following occupational classes: 1) Pedagogical, 2)  
87 Creative/Linguistic, 3) Commercial, 4) Business/Administrative, 5) Management, 6)  
88 Governmental/Law/Safety, 7) Technical, 8) Information and Communication Technology  
89 (ICT), 9) Agricultural, 10) Health Care/Welfare, 11) Service, 12) Transportation/Logistics (see  
90 Additional file 1). The BRC 2014 additionally includes a 13<sup>th</sup> “Other” category (mostly  
91 applicable when occupational descriptions are absent or unclear), and makes further  
92 divisions into segments and subgroups. For the present paper, we were only interested in the  
93 occupational classes (i.e. classification at the segment level would result in 40 groups of  
94 insufficient size). We excluded participants in the “Other” category and those classified as  
95 “no occupation”. When multiple occupations were listed for a given participant, we used the  
96 first job title for consistency reasons.

97

98 The assignment of BRC 2014 codes was performed by two raters (A.C.v.L and K.W.). To  
99 promote interrater consistency, a subset of the sample was independently coded and  
100 subsequently compared. Discordant cases were discussed with R.O. to reach consensus.  
101 The remaining sample was divided among A.C.v.L. and K.W., and only ambiguous cases  
102 were discussed and coded together. In rare occasions where this did not resolve  
103 classification uncertainty, medical records were inspected for more details on occupational  
104 history. If this did not provide useful information, the participant was coded as 13 (unclear),  
105 hence excluded for further analysis.

106

### 107 Sample selection

108 We initially selected all ADC individuals with a dementia diagnosis at the baseline visit and  
109 information on occupational history. Exclusion criteria were: 1) age below 40 years, 2)  
110 presence of autosomal dominant mutations for a neurodegenerative disease. The original  
111 selection consisted of 2,310 participants, of which we excluded 142 individuals with  
112 occupational descriptions that were either non-informative, indicative of unemployment or not

113 detailed enough (even after inspection of medical records). Finally, we decided to omit the  
114 category ICT due to the small sample size (n=12). ICT is a relatively “young” sector that did  
115 not have a prominent position in the labor market during the period in which the majority of  
116 our sample was employed. Similarly, 35 patients with relatively rare forms of dementia (e.g.  
117 alcohol-related dementias, normal pressure hydrocephalus, Creutzfeldt–Jakob disease) were  
118 excluded (Figure 1). The final sample included 2,121 individuals, with a diagnosis of AD  
119 (n=1,467), FTD (n=281), VaD (n=98), DLB (n=174) or PSP/CBD (n=101).

120

### 121 Vascular risk factors

122 Complete data on VRFs were available for the majority of our sample (n=1,562/2,121), and  
123 included body mass index (BMI), smoking, alcohol use (units per day), and presence or  
124 absence of a myocardial infarction, hypertension, hypercholesterolemia and diabetes mellitus  
125 in the medical history. We dichotomized BMI ( $\leq 25=0$ ,  $>25=1$ ), smoking (never smoked=0,  
126 ever smoked=1) and alcohol (0-1 units per day=0,  $>1$  units per day=1) in order to derive a  
127 VRF score based on the sum of these seven risk factors [24].

128

### 129 Neuropsychological assessment

130 Nearly all individuals underwent an elaborate neuropsychological assessment within three  
131 months of their diagnosis. For the AD dementia subsample, we therefore had a large dataset  
132 available (n=1,071/1,467) that consisted of participants who were cognitively tested in each  
133 of four cognitive domains: memory, attention/executive function, language and visuospatial  
134 function [25]. The memory domain included the total immediate and delayed recall as well as  
135 the recognition condition of the Rey Auditory Verbal Learning Test, and total recall in  
136 condition A of the Visual Association Test. In the attention/executive function domain, we  
137 used the Trail Making Test (part A and B), Stroop Test (condition I-III), 90-second Letter Digit  
138 Substitution Test [26], Digits Forward and Backwards, Letter Fluency and total score on the  
139 Frontal Assessment Battery. The language domain consisted of the Category Fluency, a  
140 short version of the Boston Naming Test and the total number of correctly named items of

141 the Visual Association Test. Finally, the visuospatial function domain was assessed with the  
142 Dot Counting, Number Location and Fragmented Letters subtests of the Visual Object and  
143 Space Perception battery.

144

145 We carried out multiple imputation in SPSS 22.0 for Windows (SPSS, Chicago, IL, USA) to  
146 account for missing data (ranging from 1-45% per test). This procedure was performed using  
147 the fully conditional specification method, an iterative Markov Chain Monte Carlo approach  
148 suitable for arbitrary patterns of missing data. We imputed 25 datasets and included  
149 demographic, clinical, neuropsychological variables, APOE status and cerebrospinal fluid  
150 biomarkers as predictors in the model (i.e. occupational code was not used). In the pooled  
151 dataset, we created standardized residuals (i.e. *W*-scores) for each neuropsychological test  
152 score based on regressions with age, sex and educational level (measured on a seven-item  
153 scale, [27]). We calculated average *W*-scores across tests measuring memory,  
154 attention/executive function, language and visuospatial function, to obtain cognitive domain  
155 scores.

156

157 These cognitive domain scores were subsequently used to divide AD participants into clinical  
158 phenotypes, according to a previously validated method [28]. Specifically, we averaged  
159 across cognitive domains to create a “global cognition” composite score for each participant.  
160 Next, each cognitive domain score was dichotomized based on whether they were below a  
161 certain threshold relative to the global cognition score. A score of 1 thus means that a given  
162 cognitive domain “stands out” by being more affected than (the combination of) other  
163 domains. Based on these dichotomized scores, we assigned each participant to one of the  
164 following cognitive profiles: 1) memory-dominant, 2) attention/executive-dominant, 3)  
165 language-dominant, 4) visuospatial-dominant, 5) multi-domain (i.e. either more than one or  
166 no cognitive domain=1). As this profile categorization relies on which threshold is used to  
167 dichotomize the cognitive domain scores, we systematically tested all values between .250  
168 and .500, and selected .225 as the “optimal” value that yielded 1) the lowest number of

169 participants in the multi-domain profile, 2) the lowest sum of squared group sizes  
170 (Supplementary Figure 1). Most individuals had a memory-dominant cognitive profile  
171 (n=292), followed by a language-dominant (n=140), attention/executive-dominant (n=130)  
172 and visuospatial-dominant subgroup (n=126). The remaining participants fell into the multi-  
173 domain category (n=383).

174

### 175 Statistical analyses

176 First, we carried out a  $\chi^2$  analysis in the total sample to investigate if the distribution of  
177 dementia types differed across occupational classes. In a second analysis, we reran the  
178 same model after exclusion of 93 persons with comorbid dementias (e.g. persons with AD as  
179 the primary diagnosis, but who also met NINDS-AIREN criteria for VaD) to create a sample  
180 with less overlap between diagnostic groups.

181

182 When  $\chi^2$  results were significant, we post-hoc inspected the adjusted residuals of each  
183 combination of occupation and dementia type. Adjusted residuals reflect the difference  
184 between the expected and observed count (e.g. the number of AD participants in the  
185 Pedagogical occupational class). An absolute value of  $\sim 2$  (i.e. 1.96 or -1.96) is considered  
186 significant at the  $p < .05$  level. Since our contingency table was relatively large, we used a  
187 more stringent adjusted residual value threshold of  $\sim 3$  (i.e. 3.29 or -3.29 corresponds to  
188  $p < .001$ ; [29]). In addition, to assess whether the main relationships observed in significant  
189  $\chi^2$  analyses could be explained by other demographic and health variables, we additionally  
190 performed logistic regressions. Specifically, we predicted dementia type from occupational  
191 class and evaluated age, sex, education and VRF score as potential explanatory variables.  
192 We used a forward selection procedure with a change-in-estimate (CIE) criterion of 10%  
193 [30,31] and ran these models in all participants with complete data (n=1,562/2,121).

194

195 Finally, we carried out  $\chi^2$  analyses to investigate whether occupation related to cognitive  
196 profiles within the AD subsample, following the same approach as described above. In a



197 second analysis, we reran the same model using a different threshold for the dichotomization  
198 of cognitive domain scores (and subsequent categorization of participants into cognitive  
199 profiles; Supplementary Figure 1), and compared results to evaluate robustness of our  
200 findings.

201

## 202 **Results**

### 203 Participants

204 The mean age across diagnostic groups was  $67\pm 8$  years (Table 1). Individuals with FTD  
205 were younger compared to other groups ( $63\pm 7$ ), and DLB participants were significantly older  
206 than the AD group ( $69\pm 7$ ). Overall, our sample included a somewhat larger proportion of  
207 males (57%), presumably reflecting the historically higher prevalence of males in the labor  
208 market (by comparison, the excluded “no occupation” sample was 82% female). The  
209 proportion of males was even higher among DLB participants (82%) in comparison with most  
210 other groups, while this was significantly lower for AD (52%) in contrast to all groups except  
211 PSP/CBD. Educational level was similar across dementia types (except for a DLB>VaD  
212 difference). Global cognitive impairment was most severe among AD participants (mean  
213 MMSE= $20\pm 5$ ). Finally, VaD participants had a higher VRF score than most other diagnostic  
214 groups ( $p<.05$ ; except FTD). Table 2 provides an overview of the number of participants in  
215 each occupational class for the total sample and according to dementia type. The largest  
216 occupation groups were Technical ( $n=429$ , 20%) and Business/Administrative ( $n=388$ , 18%),  
217 while the Agricultural class had the lowest number of participants ( $n=31$ , 1%).

218

### 219 Relationship between occupation and dementia types

220 There were significant differences in the distribution of dementia types across occupation  
221 groups ( $\text{Chi}^2=85.87$ ,  $p<.001$ , Table 2). The adjusted residuals revealed three effects  
222 significant at  $p<.001$ . First, individuals from the Transportation/Logistics sector were more  
223 often diagnosed with VaD (adjusted residual: 4.0). Second, this occupational class had fewer  
224 AD participants (adjusted residual: -3.7). Third, in the Health Care/Welfare group, AD was

225 relatively common (adjusted residual: 3.6). These results are displayed in Figure 2, along  
226 with 11 other effects (e.g. a high proportion of PSP/CBD cases in the Agricultural sector) that  
227 were significant at  $p < .05$  (adjusted residuals  $> 2$  or  $< -2$ ). When we repeated the  $\text{Chi}^2$  analysis  
228 with exclusion of 93 individuals with comorbid dementias ( $n=2,028$ ), results remained  
229 essentially unchanged ( $\text{Chi}^2=78.73$ ,  $p < .001$ ; Supplementary Table 1).

230

### 231 Contribution of age, sex, education and vascular risk factors

232 In line with the previous results, uncorrected logistic regression models with either AD or VaD  
233 as a dependent variable (AD/VaD=1 in separate models, other diagnosis=0) confirmed  
234 Transportation/Logistics to be significantly related to both VaD ( $\beta=1.23$ , odds ratio [OR] =  
235 3.41,  $p=.004$ ) and AD ( $\beta=-.85$ , OR=.43,  $p=.001$ ). Likewise, Health Care/Welfare was a  
236 significant determinant of AD ( $\beta=.55$ , OR=1.74,  $p=.003$ ; Supplementary Table 2). Forward  
237 selection of explanatory variables in corrected models revealed that VRF score, but no other  
238 factors (i.e. age, sex, education), was positively associated with a VaD diagnosis ( $\beta=.43$ ,  
239 OR=1.53,  $p < .001$ ) and reduced the Transportation/Logistics effect by 15% (from  $\beta=1.23$  to  
240 1.04, OR=3.41 to 2.84). For AD, only the variable sex (range  $\beta=.68-.69$ , OR=1.96-1.98,  
241  $p < .001$ ) significantly reduced the effects of Transportation/Logistics (from  $\beta=-.85$  to  $-.62$ ,  
242 OR=.43 to .54; 27%) and Health Care/Welfare (from  $\beta=.55$  to .31, OR=1.74 to 1.37; 43%).  
243 Figure 3 gives an overview of the number of VRFs and percentage of males for all dementia  
244 types and occupational classes.

245

### 246 Relationship between occupation and cognitive profiles of AD

247 We found only trend-significant differences between occupations in the distribution of  
248 cognitive profiles ( $\text{Chi}^2=53.65$ ,  $p=.073$ ; Table 3). Supplementary Figure 2 provides an  
249 overview of these findings. In a secondary analysis, we repeated the same analysis using  
250 cognitive profiles that were calculated based on a different threshold of  $-.442$  (Supplementary  
251 Figure 1). Similar to the original findings, these results were not significant ( $\text{Chi}^2=38.24$ ,  
252  $p=.550$ ).

253

254 Discussion

255 In this exploratory study, we investigated the association between occupation and dementia  
256 (sub)types in a large sample of memory-clinic patients. The main finding was that VaD was  
257 relatively common in participants with Transportation/Logistics occupations. Post-hoc  
258 analyses suggested that this relationship was partly explained by a higher number of VRFs  
259 among these individuals. In addition, the number of AD participants was relatively low in the  
260 Transportation/Logistics sector, and high among Health Care/Welfare occupations. We found  
261 that these effects were mostly attributable to differences between groups in sex distribution.  
262 There was no relationship between occupation types and AD-related cognitive profiles.

263

264 Our finding that VRFs are more prominent among VaD participants is in line with previous  
265 studies [32,33], but of particular interest was our observation of a higher number of VRFs in  
266 Transportation/Logistics occupations. Although we cannot make any inferences about  
267 dementia risk (due to the absence of a healthy control group), it raises the possibility that  
268 certain job-related aspects or occupational habits contribute to the development of VRFs and  
269 the emergence of VaD. Our data at least warrant an increased awareness and monitoring of  
270 VRFs by occupational physicians in the Transport/Logistics sector. Furthermore, the lower  
271 presence of AD cases in Transpiration/Logistics groups (male-predominant) versus higher  
272 AD occurrence Healthcare/Welfare (female-predominant), is in line with evidence that  
273 women have a higher risk for AD than men [34,35]. Importantly, while VRFs and sex partially  
274 explained our main occupation-dementia relationships, these factors did not account for all  
275 variance. This suggests there might be other important ways in which occupations are  
276 related to the emergence and manifestation of dementia.

277

278 In addition, it is worth mentioning that a relatively large proportion of the Agricultural sector  
279 consisted of PSP/CBD cases (i.e. 13% versus 5% in the total sample). This effect was  
280 significant at  $p < .05$  (not at  $p < .001$ ), but as the Agricultural group was rather small compared

281 to other occupational classes (n=31), this may be due to a lack of statistical power. Although  
282 largely speculative, we propose that this effect could be related to exposure to pesticides  
283 [36]. There has been increasing evidence that pesticides are a risk factor for Parkinson's  
284 disease [37], and one study has also demonstrated a specific link between pesticide  
285 exposure and PSP [38].

286

287 In contrast to our present study, most previous studies operationalized occupation by  
288 complexity level. Apart from coarse ratings such as "white versus blue collar", more fine-  
289 grained classifications have been made in which the complexity of multiple occupational  
290 aspects was considered. An example is the use of questionnaires that differentiated between  
291 working with "people, data or things" (e.g. [12]). However, although these approaches have  
292 provided important insights, they did not consider other potential job-related risks or  
293 protective factors. The few studies that did take a more qualitative approach towards the  
294 measurement of occupation have used "job exposure matrices" or "occupational description  
295 databases" to show, among other results, that dementia risk and late-life cognition were  
296 influenced by the degree of work control (e.g. influence over work planning, variation in task  
297 content) [39], level of human interaction and physical activity [40] and mental demands (e.g.  
298 information processing, pattern detection, creativity) [41].

299

300 The novelty of the present work lies our "assumption-free" approach that did not involve any  
301 additional characterization of occupations besides their categorization across 11  
302 occupational classes. This enabled examining relationships between occupation and  
303 dementia (sub)types in an exploratory manner. Importantly, there was no straightforward  
304 relationship between occupational classes and complexity level. Most classes comprised  
305 occupations that varied considerably with respect to complexity (e.g. the "Technical" group  
306 both contained engineers and assembly workers, see Additional file 1). Another strength of  
307 our study is the fact that our sample consisted of dementias with different suspected  
308 etiologies. Most earlier studies have either focused on the occurrence of dementia as a

309 general syndrome or one particular form of dementia. As our dataset included over two  
310 thousand carefully diagnosed participants, we were able to create several independent  
311 diagnostic groups and AD-related cognitive profiles that were sufficiently sized for statistical  
312 analysis. Finally, we consider use of the BRC 2014 classification system to be an important  
313 advantage, because it improves the replicability of our findings across other populations on  
314 an international scale.

315

316 Our study has several limitations. First, although we collected occupational data with a  
317 refined method that involved a semi-structured interview with the patient and caregiver, we  
318 did not have detailed enough information to capture a person's entire occupational timeline.  
319 For individuals who had multiple occupations listed, we often could not retrieve their  
320 sequence and respective durations. It is therefore possible that the first-mentioned job not  
321 always reflect the person's foremost/primary occupation, but rather the most recent  
322 occupation. This is non-optimal because of potential reverse causation: we cannot rule out  
323 that some patients switched jobs as a consequence of their dementia diagnosis (e.g.  
324 choosing less demanding work in a different sector). However, we have no reason to assume  
325 that reverse causation is more prominent for some dementia (sub)types than others, and  
326 thus the degree of bias seems limited. Second, we were unable to define occupation groups  
327 beyond the highest hierarchical level of the BRC 2014, due to a lack of detail in occupational  
328 descriptions and the fact that the resulting number of categories would be too large for our  
329 sample size (i.e. ~40 occupation groups). More detailed distinctions between occupations  
330 may have revealed additional relevant occupation-dementia relationships that were currently  
331 missed. Third, the absence of a healthy control group restricted our ability to make  
332 inferences about dementia risk or distinguish between protective and harmful effects of  
333 occupation (Supplementary Figure 3), which limits the interpretability of our results.

334

### 335 **Conclusions**

336 To conclude, we demonstrated relationships between occupation and dementia types. Our

337 findings suggest that these relationships emerged beyond occupational complexity level.  
338 Differences between occupational classes in the number of VRFs and sex distributions  
339 partially explained our results, but other - currently unknown - factors likely play a role as  
340 well. It is important to note that associations between occupation and dementia could exist  
341 for multiple reasons. Whilst it seems plausible that some occupational characteristics  
342 causally relate to the occurrence of specific dementia types, another possibility is that certain  
343 (genetic or early environmental) factors both influence career choice and dementia  
344 development later in life. This is consistent with theoretical frameworks that propose a  
345 neurodevelopmental component in the etiology of dementia [42-44]. Ultimately, as most  
346 people spend the majority of their life working, occupation could be an important lifestyle  
347 factor to consider in relation to preventive strategies for dementia. A better understanding of  
348 occupation-dementia relationships may improve occupational health policy through reduction  
349 of job hazards and more targeted health monitoring by occupational physicians.

350

#### 351 **List of abbreviations**

352 AD – Alzheimer’s disease, VaD – vascular dementia, FTD – frontotemporal dementia, DLB –  
353 Lewy Body disease, PSP – progressive supranuclear palsy, CBD – corticobasal  
354 degeneration, ADC – Amsterdam Dementia Cohort, MRI – magnetic resonance imaging,  
355 BRC 2014 – Dutch ROA-CBS 2014 occupational categorization system, ISCO 2008 – the  
356 International Standard Classification of Occupations 2008, ICT – Information and  
357 Communication Technology, BMI – body mass index, VRF – vascular risk factor, CIE –  
358 change-in-estimate, OR – odds ratio.

359

#### 360 **Declarations**

##### 361 Ethics approval and consent to participate

362 Participants gave written informed consent to use their medical data for scientific purposes.

363 This procedure was approved by the local Medical Ethics Committee.

364

365 Consent for publication

366 Not applicable

367

368 Availability of data and material

369 The datasets used and/or analyzed during the current study are available from the  
370 corresponding author on reasonable request.

371

372 Competing interests

373 The authors declare that they have no competing interests.

374

375 Funding

376 Research of Alzheimer Center Amsterdam is part of the Neurodegeneration program of  
377 Amsterdam Neuroscience. The Alzheimer Center Amsterdam is supported by Alzheimer  
378 Nederland, Het Genootschap and Stichting VUMC funds. W.M. van der Flier holds the  
379 Pasman chair. This research was funded by the Internationale Stichting Alzheimer  
380 Onderzoek (ISAO) (to R.O.).

381

382 Authors' contributions

383 A.C.v.L. was involved in the methodological design of the research project and assignment of  
384 occupational codes; she furthermore conducted the statistical analyses, interpreted the data  
385 and wrote the manuscript. C.d.B. was responsible for the selection of the participant data  
386 from the ADC. K.W. took part in the methodological design and the assignment of  
387 occupational codes. Y.A.P., A.W.L., F.H.B., N.D.P., and P.S. were involved in the  
388 standardized screening process of participants and collection of occupational history data.  
389 R.O. was involved in the methodological design of the research project, interpretation of the  
390 data and writing the manuscript. W.M.v.d.F. is the coordinator of the ADC, and took part in  
391 the interpretation of the data and editing of the manuscript. All authors read and approved  
392 the final manuscript.

393

394 Acknowledgements

395 Not applicable

396

397

398

399

400

401

## References

1. Prince M, Wilmo A, Guerchet M, Ali G, Wu Y, Prina M. World Alzheimer Report 2015. The Global Impact of Dementia: An Analysis of Prevalence, Incidence, Cost and Trends. Alzheimer's Disease International. 2015.
2. Bonaiuto S, Rocca WA, Lippi A, Giannandrea E, Mele M, Cavarzeran F, Amaducci L. Education and Occupation as Risk Factors for Dementia: A Population-Based Case-Control Study. *Neuroepidemiology* 1995; 14:101-109.
3. Stern Y, Albert S, Tang MX, Tsai WY. Rate of memory decline in AD is related to education and occupation. *Neurology*. 1999;53(9):1942-7.
4. Hughes TF, Ganguli M. Modifiable Midlife Risk Factors for Late-Life Cognitive Impairment and Dementia. *Curr Psychiatry Rev*. 2009; 5(2): 73–92.
5. Dekhtyar S, Wang HX, Fratiglioni L, Herlitz A. Childhood school performance, education and occupational complexity: a life-course study of dementia in the Kungsholmen Project. *Int J Epidemiol*. 2016; 45(4):1207-1215.
6. Ihle A, Ghisletta P, Ballhausen N, Fagot D, Vallet F, M Baeriswyl, et al. The role of cognitive reserve accumulated in midlife for the relation between chronic diseases and cognitive decline in old age: A longitudinal follow-up across six years. *Neuropsychologia* 2018, 121: 37-46.
7. Foubert-Samier A, Catheline G, Amieva H, Dilharreguy B, Helmer C, Allard M, Dartigues



- JF. Education, occupation, leisure activities, and brain reserve: a population-based study. *Neurobiol Aging*. 2012; 33(2):423.e15-25.
8. Correa Ribeiro PC, Lopes CS, Lourenço RA. Complexity of lifetime occupation and cognitive performance in old age. *Occupational Medicine* 2013; 63(8): 556–562.
  9. Vemuri P, Lesnick TG, Przybelski SA, Knopman DS, Preboske GM, Kantarci K, et al. Vascular and amyloid pathologies are independent predictors of cognitive decline in normal elderly. *Brain* 2015; 138(3): 761–771.
  10. Placek K, Massimo L, Olm C, Ternes K, Firn K, Van Deerlin V, et al. Cognitive reserve in frontotemporal degeneration: Neuroanatomic and neuropsychological evidence. *Neurology* 2016; 87(17):1813-1819.
  11. Pool LR, Weuve J, Wilson RS, Bültmann U, Evans DA, Mendes de Leon CF. Occupational cognitive requirements and late-life cognitive aging. *Neurology* 2016; 86(15):1386-1392.
  12. Lane AP, Windsor TD, Andel R, Luszcz MA. Is Occupational Complexity Associated with Cognitive Performance or Decline? Results from the Australian Longitudinal Study of Ageing. *Gerontology* 2017; 63(6):550-559.
  13. Kaup AR, Xia F, Launer LJ, Sidney S, Nasrallah I, Erus G, et al. Occupational cognitive complexity in earlier adulthood is associated with brain structure and cognitive health in midlife: The CARDIA study. *Neuropsychology* 2018; 32(8):895-905.
  14. Dekhtyar S, Wang HX, Scott K, Goodman A, Koupil I, Herlitz A. A Life-Course Study of Cognitive Reserve in Dementia--From Childhood to Old Age. *Am J Geriatr Psychiatry* 2015;23(9):885-96.
  15. Vuoksima E, Rinne JO, Lindgren N, Heikkilä K, Koskenvuo M, Kaprio J. Middle age self-report risk score predicts cognitive functioning and dementia in 20-40 years. *Alzheimers Dement (Amst)*. 2016;4:118-125.
  16. Rusmaully J, Dugravot A, Moatti JP, Marmot MG, Elbaz A, Kivimaki M, et al. Contribution of cognitive performance and cognitive decline to associations between socioeconomic factors and dementia: A cohort study. *PLoS Med* 2017;14(6):e1002334.

17. Wang HX, MacDonald SW, Dekhtyar S, Fratiglioni L. Association of lifelong exposure to cognitive reserve-enhancing factors with dementia risk: A community-based cohort study. *PLoS Med* 2017;14(3):e1002251.
18. Massimo L, Xie SX, Rennert L, Fick DM, Halpin A, Placet K, et al. McMillan, Occupational attainment influences longitudinal decline in behavioral variant frontotemporal degeneration. *Brain Imaging Behav.* 2018. doi: 10.1007/s11682-018-9852-x
19. Santibáñez M, Bolumar F, García AM. Occupational risk factors in Alzheimer's disease: a review assessing the quality of published epidemiological studies. *Occup Environ Med.* 2007;64(11):723-32.
20. Killin LO, Starr JM, Shiue IJ, Russ TC. Environmental risk factors for dementia: a systematic review. *BMC Geriatr.* 2016;16(1):175.
21. Fouarge D, Dijkman S. Beroepenindeling ROA-CBS 2014 (BRC 2014). (ROA Technical Reports; No. 005). Maastricht: Research Centre for Education and the Labour Market; 2015.
22. Van der Flier WM, Pijnenburg YA, Prins N, Lemstra AW, Bouwman FH, Teunissen CE, et al. Optimizing patient care and research: the Amsterdam Dementia Cohort. *J Alzheimers Dis.* 2014;41(1):313-327.
23. Van der Flier WM, Scheltens P. Amsterdam Dementia Cohort: Performing Research to Optimize Care. *J Alzheimers Dis.* 2018;62(3):1091-1111.
24. Groot C, Sudre CH, Barkhof F, Teunissen CE, Van Berckel BNM, Seo SW, et al. Clinical phenotype, atrophy, and small vessel disease in APOE $\epsilon$ 2 carriers with Alzheimer disease. *Neurology* 2018;91(20):e1851-e1859 .
25. Groot C, Van Loenhoud AC, Barkhof F, Van Berckel BNM, Koene T, Teunissen CE, et al. Differential effects of cognitive reserve and brain reserve on cognition in Alzheimer's disease. *Neurology* 2018; 90(2): e149-e156.
26. Van der Elst W, Van Boxtel MPJ, Van Breukelen GJP, Jolles J. The Letter Digit Substitution Test: Normative Data for 1,858 Healthy Participants Aged 24–81 from the

- Maastricht Aging Study (MAAS): Influence of Age, Education, and Sex, *Journal of Clinical and Experimental Neuropsychology* 2006; 28(6):998-1009.
27. Verhage F. *Intelligence and age (in Dutch)*. Assen: Van Gorcum; 1964.
  28. Crane PK, Trittschuh E, Mukherjee S, Saykin AJ, Sanders RE, Larson EB, et al. Incidence of cognitively defined late-onset Alzheimer's dementia subgroups from a prospective cohort study. *Alzheimers Dement*. 2017;13(12):1307-1316.
  29. Sharpe D. *Your chi-square test is statistically significant: Now what? Practical Assessment, Research & Evaluation* 2015.
  30. Mickey RM, Greenland S. The impact of confounder selection criteria on effect estimation. *Am J Epidemiol*. 1989;129:125–37.
  31. Maldonado G, Greenland S. Simulation study of confounder-selection strategies. *Am J Epidemiol*. 1993;138(11):923–36.
  32. Fillit H, Nash DT, Rundek T, Zuckerman A. Cardiovascular risk factors and dementia. *Am J Geriatr Pharmacother*. 2008;6(2):100-118.
  33. Tariq S, Barber PA. Dementia risk and prevention by targeting modifiable vascular risk factors. *J. Neurochem*. 2018; 144:565-581.
  34. Viña J, Lloret A. Why women have more Alzheimer's disease than men: gender and mitochondrial toxicity of amyloid-beta peptide. *J Alzheimers Dis*. 2010;20 Suppl 2:S527-33.
  35. Podcasy JL, Epperson CN. Considering sex and gender in Alzheimer disease and other dementias. *Dialogues Clin Neurosci*. 2016;18(4):437-446.
  36. Gangemi S, Miozzi E, Teodoro M, Briguglio G, De Luca A, Alibrando C, et al. Occupational exposure to pesticides as a possible risk factor for the development of chronic diseases in humans (Review). *Mol Med Rep*. 2016;14(5):4475-4488.
  37. Brouwer M, Huss A, Van der Mark M, Nijssen PCG, Mulleners WM, Sas AMG, et al. Environmental exposure to pesticides and the risk of Parkinson's disease in the Netherlands. *Environ Int*. 2017; 107: 100-110.
  38. Litvan I, Lees PS, Cunningham CR, Rai SN, Cambon AC, Standaert DG, et al.

- Environmental and occupational risk factors for progressive supranuclear palsy: Case-control study. *Movement disorders: official journal of the Movement Disorder Society* 2016, 31(5), 644-52.
39. Hasselgren C, Dellve L, Ekbrand H, Zettergren A, Zetterberg H, Blennow K, et al. Socioeconomic status, gender and dementia: The influence of work environment exposures and their interactions with APOE  $\epsilon$ 4. *SSM Popul Health*. 2018;5:171-179.
40. Potter GG, Helms MJ, Plassman BL. Associations of job demands and intelligence with cognitive performance among men in late life. *Neurology*.2007;70(19 Pt 2):1803-8.
41. Then FS, Luck T, Hesser K, Ernst A, Posselt T, Wiese B, et al. Which types of mental work demands may be associated with reduced risk of dementia? *Alzheimers Dement*. 2017;13(4):431-440.
42. Miller ZA, Rosenberg L, Santos-Santos MA, Stephens M, Allen IE, Hubbard HI, et al. Prevalence of Mathematical and Visuospatial Learning Disabilities in Patients With Posterior Cortical Atrophy. *JAMA Neurol*. 2018;75(6):728-737.
43. Miller ZA, Mandelli ML, Rankin KP, Henry ML, Babiak MC, Frazier DT, et al. Handedness and language learning disability differentially distribute in progressive aphasia variants. *Brain*. 2013;136(11):3461-3473.
44. Geschwind DH, Robidoux J, Alarcón M, Miller BL, Wilhelmsen KC, Cummings JL, et al. Dementia and neurodevelopmental predisposition: cognitive dysfunction in presymptomatic subjects precedes dementia by decades in frontotemporal dementia. *Ann Neurol*. 2001;50(6):741-746.

**Figure 1. Flow diagram of the study sample.**

ADC=Amsterdam dementia cohort, BRC 2014= Dutch ROA-CBS 2014 occupational categorization system, a derivative of the Standard Classification of Occupations 2008 (ISCO 2008), ICT= Information and Communication Technology.

**Figure 2. Proportions of dementia types for each occupational class.**

AD=Alzheimer's disease dementia, FTD=frontotemporal dementia, VaD=vascular dementia, DLB=Lewy Body disease, PSP=progressive supranuclear palsy, CBD=corticobasal degeneration. \*Chi<sup>2</sup> adjusted residual  $\leq -2$  or  $\geq 2$  (corresponding to  $p < .05$ ), \*\*\*Chi<sup>2</sup> adjusted residual  $\leq -3$  or  $\geq 3$  (corresponding to  $p < .001$ ).

**Figure 3. Mean number of vascular risk factors and male percentage for occupational classes and dementia types.**

Error bars represent standard errors. AD=Alzheimer's disease dementia, FTD=frontotemporal dementia, VaD=vascular dementia, DLB=Lewy Body disease, PSP=progressive supranuclear palsy, CBD=corticobasal degeneration. VRF=vascular risk factors, including included body mass index (BMI), smoking, alcohol use (units per day), and presence or absence of a myocardial infarction, hypertension, hypercholesterolemia and diabetes mellitus in the medical history.

**Supplementary Figure 1. Thresholds used for the dichotomization of cognitive domains and division of participants across cognitive profiles.**

Within the AD subsample ( $n=1,071$ ), we dichotomized each cognitive domain score (i.e. memory, attention/executive functions, language and visuospatial functions), based on whether or not a domain's *W*-score was considerably lower compared to an individual's global cognition score. We used an optimal threshold between .250 and .500 for this dichotomization, and defined "optimality" in two different ways: 1) the lowest number of participants in the multi-domain profile and the lowest sum of squared group sizes (threshold=.255), 2) the highest number of atypical variant AD cases ( $n=85$ ) categorized into the language (i.e. for logopenic aphasia) or visuospatial cognitive profile (i.e. for PCA;  $n=.442$ ). Note that neither thresholds (i.e. .255 or .442) resulted in all atypical variants being categorized into these two cognitive profiles, presumably because in advanced disease stages, several cognitive domains become affected. For many participants with an initial logopenic aphasia or PCA diagnosis, visuospatial/language may no longer have been

predominant at study inclusion, causing them to be assigned to the multi-domain instead.

**Supplementary Figure 2. Proportions of AD-related cognitive profiles for each occupational class.**

There were no significant differences between groups (Chi<sup>2</sup> n.s.).

**Supplementary Figure 3. Schematic representation of protective and harmful effects and resulting cells in the contingency table.**

Each color (red, blue, green) represents a different occupational class. In scenario A, the red occupational class is relatively protected against dementia type 1, while the distribution of the remaining dementia types across occupations is equal. When the healthy control group is included in the analysis, this protective effect will be reflected in a higher proportion of individuals in red in the healthy group ( $4/6=67\%$  versus  $50\%$  for blue/green) and a lower percentage of red persons in the type 1 dementia group ( $0\%$  versus  $1/6=17\%$  for blue/green). All other proportions will be identical across occupational classes. However, when the healthy control group is not taken into account, the protective effect of the red occupation for dementia type 1 will create also an apparent “harmful” effect of the red occupation for dementia types 2 and 3 (i.e.  $1/2=50\%$ , compared to  $1/3=33\%$  for blue/green). In scenario B, the green occupational class shows a harmful effect on the development of dementia type 3, while no other differences between groups exist. Again, when the healthy control group is included, this only results in a lower percentage of healthy green individuals ( $1/6=17\%$  versus  $50\%$  for red/blue) and a greater proportion of persons with green occupations in dementia type 3 (i.e.  $50\%$  versus  $1/6=17\%$  for red/blue). In the absence of a healthy control group, however, the green occupational class’ harmful effect for dementia type 3 leads to an apparent “protective” effect for dementia types 1 and 2 ( $1/5=20\%$ , compared to  $1/3=33\%$  for red/blue).

**2310** participants selected from the ADC cohort with dementia and occupational descriptions

**140** participants excluded with occupational descriptions that were:

- non-informative
- indicative of unemployment

**2170** participants eligible for assignment of BRC 2014 occupational codes

**2** participants excluded with occupational descriptions that were not detailed enough to assign occupational codes

**2168** participants eligible for statistical analysis

**47** participants excluded because the size of their category was not sufficiently large:

- 12 cases with ICT occupations
- 35 cases with rare forms of dementia

**2121** participants included in the final sample

Dementia type

- AD
- FTD
- VaD
- DLB
- PSP/CBD

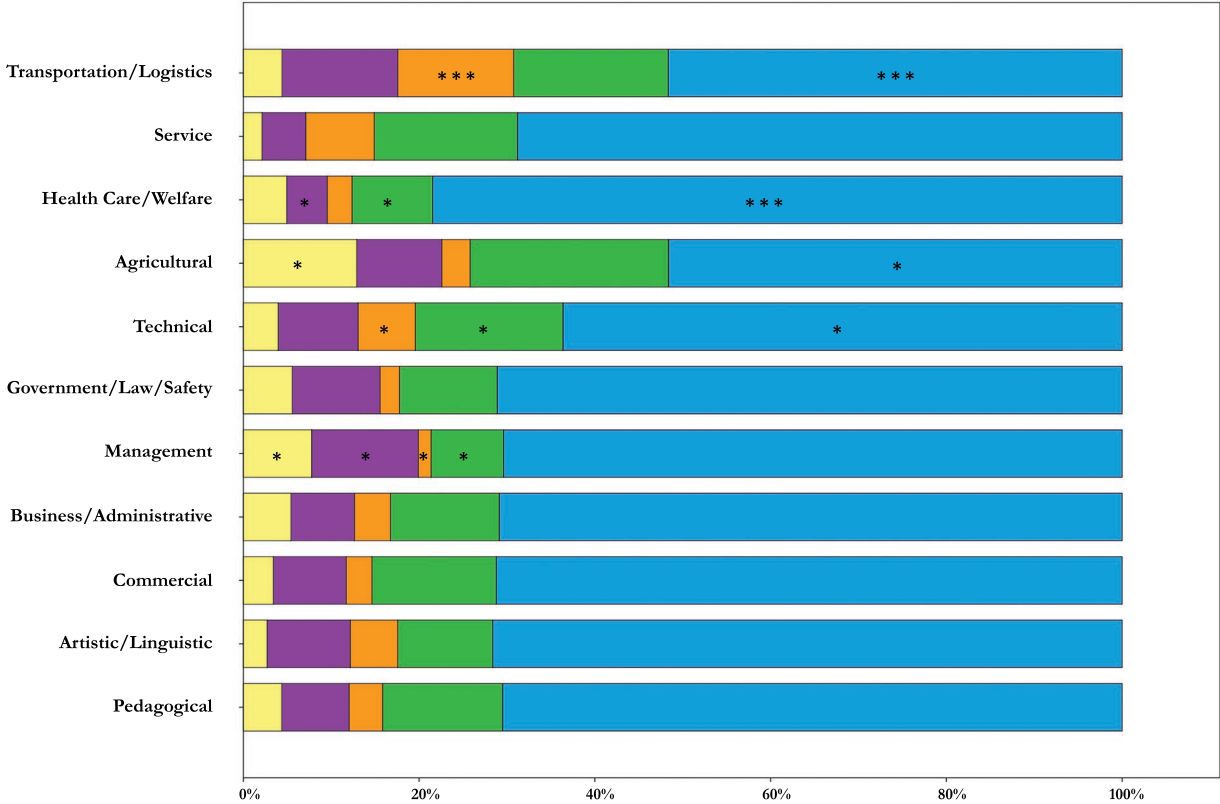



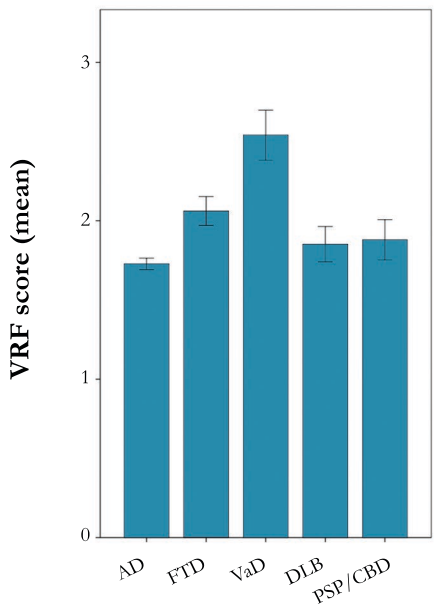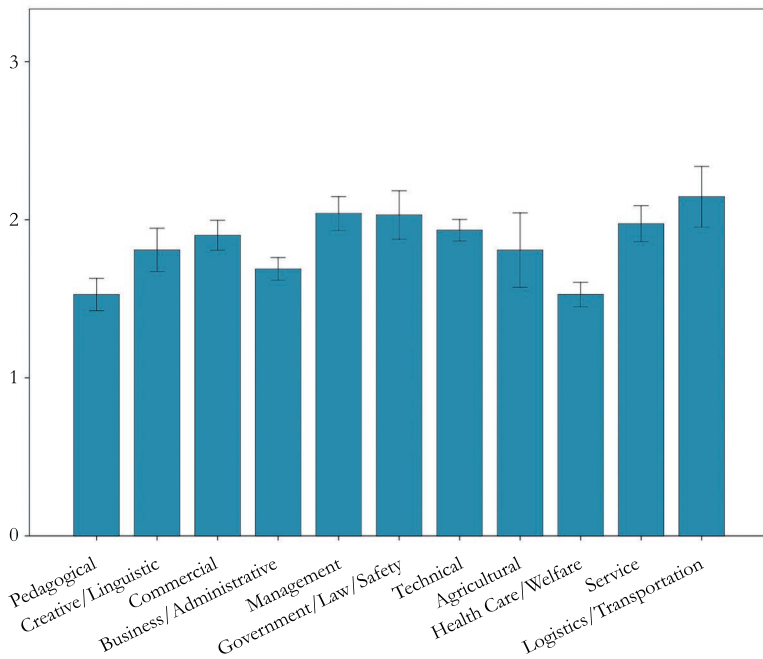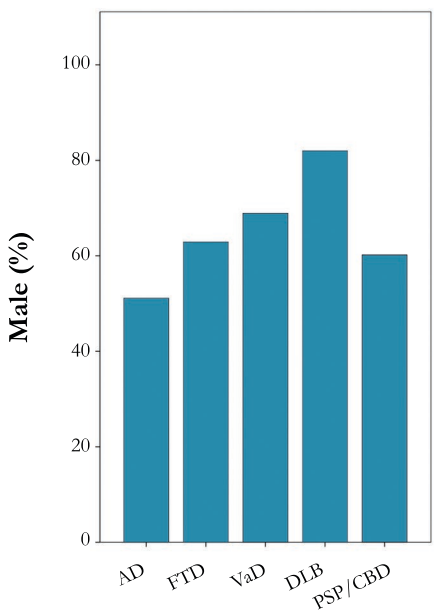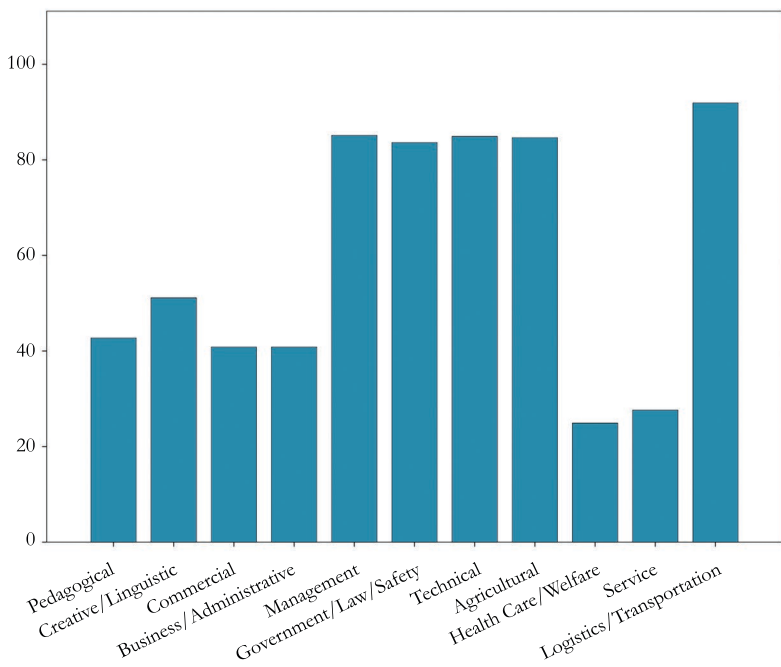

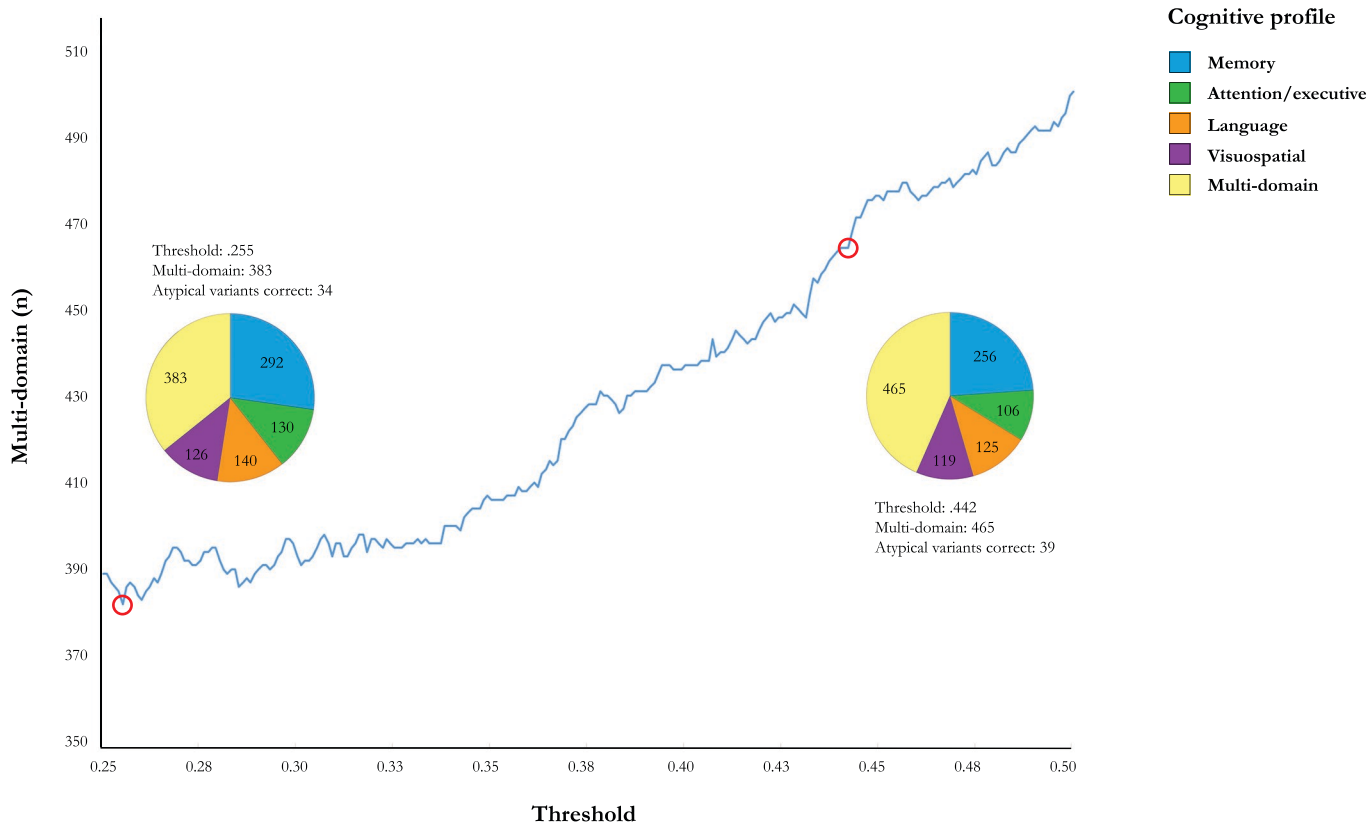

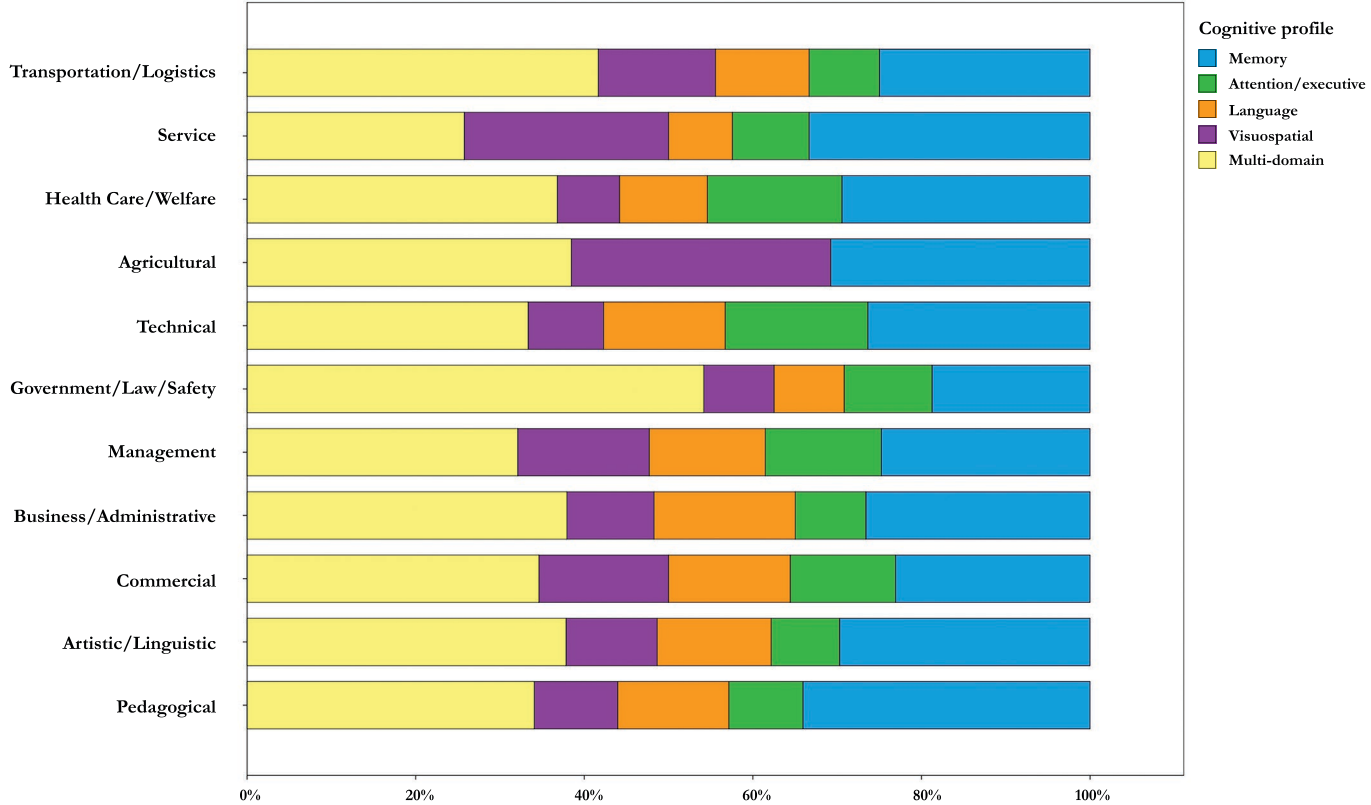

A)

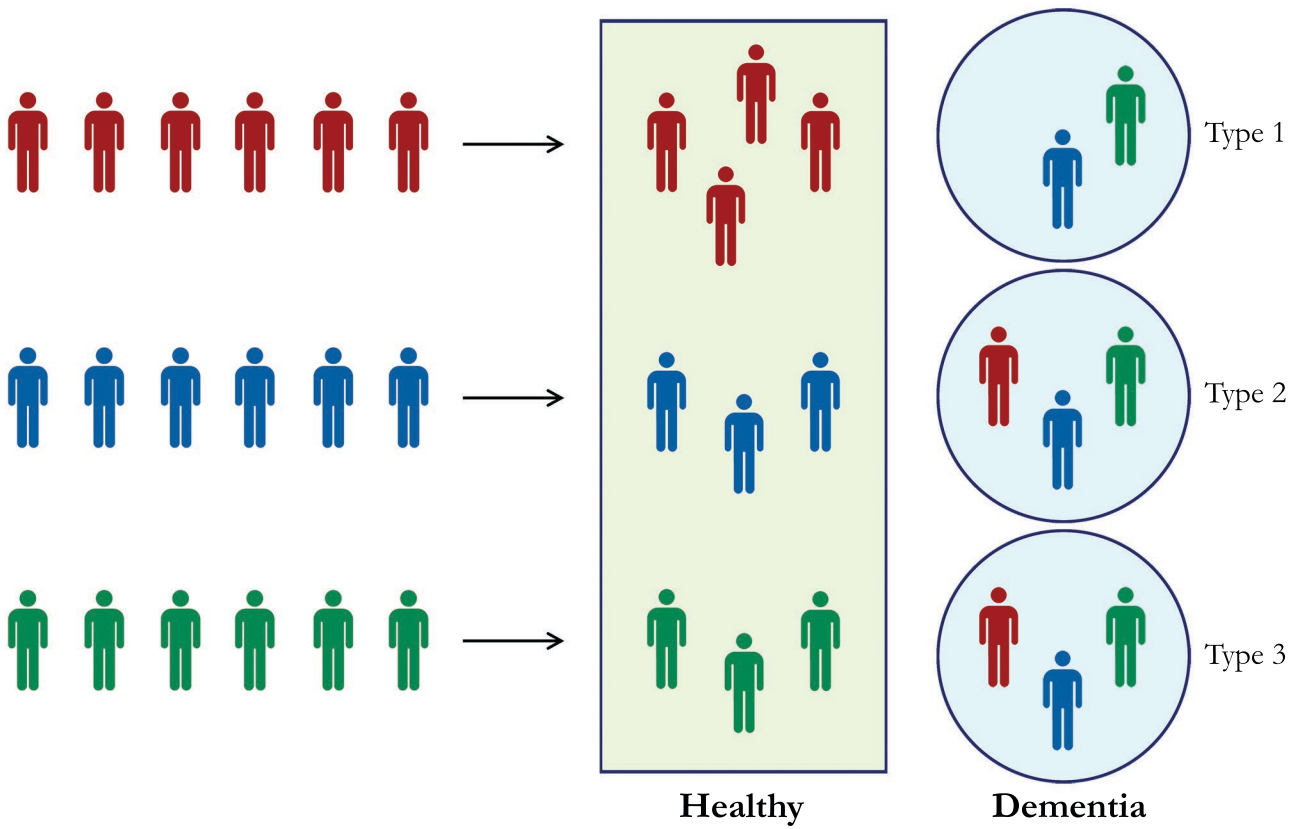

B)

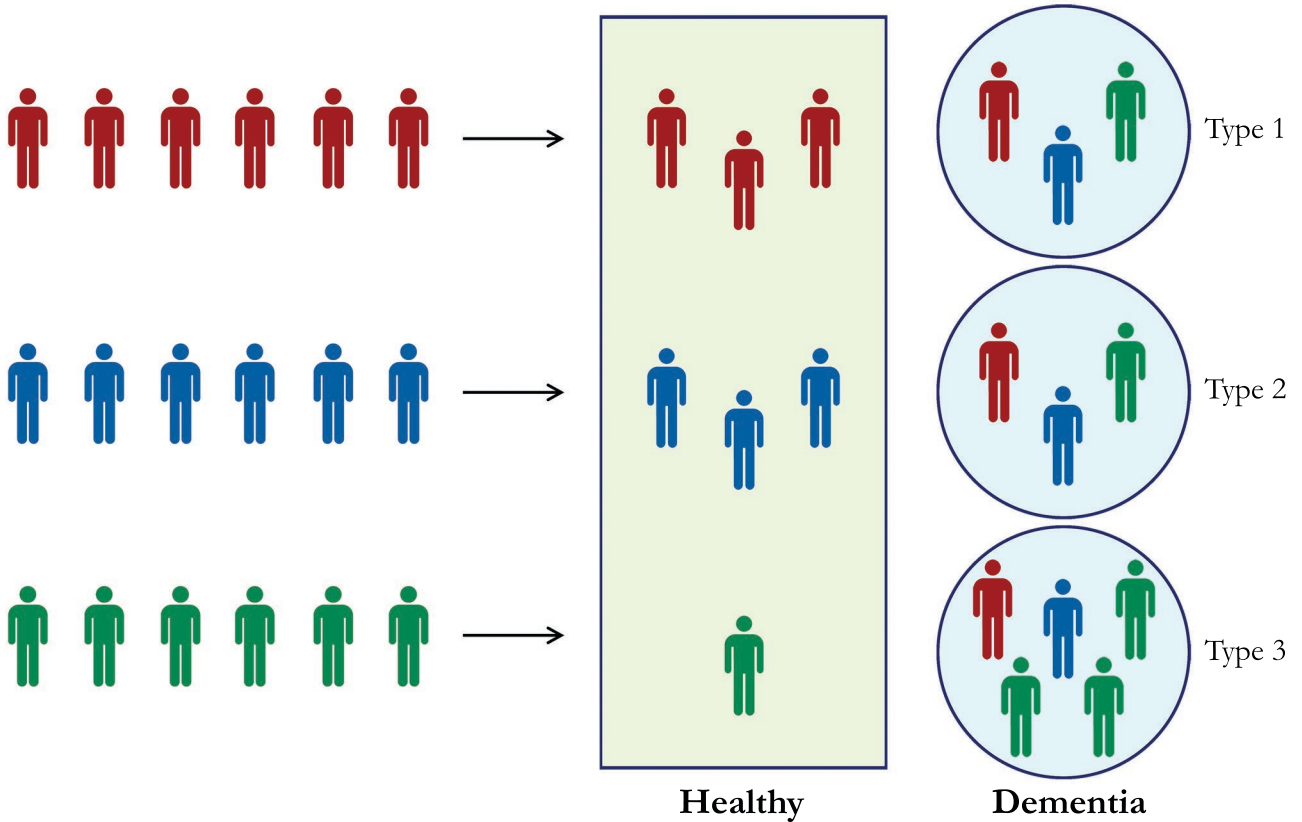

Source: https://www.medrxiv.org/content/medrxiv/early/2019/08/31/19005512.full.pdf
